# Supplementary material for: Sternal Bone Marrow Harvesting and Culturing Techniques from Patients Undergoing Cardiac Surgery
Source: MDPI journal article supplement (doi:10.3390/mi12080897), 2021-07-28
Supplement: s1 [file s1]

**Table S1.** Media and solutions used in our protocols.

| <b>Ingredient</b>                                                        | <b>Company, Cat. No.</b>             | <b>Final Conc.</b> | <b>Comment</b>                             |
|--------------------------------------------------------------------------|--------------------------------------|--------------------|--------------------------------------------|
| <b>Alcian-Blue Staining Solution</b>                                     |                                      |                    |                                            |
| Alcian-Blue <sup>a</sup>                                                 | Millipore Sigma, TMS-010-C           | 1%                 | -                                          |
| <b>Adipogenesis Differentiation Medium</b>                               |                                      |                    |                                            |
| StemPro® Adipogenesis Differentiation Basal Medium <sup>b</sup>          | ThermoFisher, A10410-01              | 1X                 | -                                          |
| StemPro® Adipogenesis Supplement <sup>c</sup>                            | ThermoFisher, A10065-01              | 1X                 | -                                          |
| Gentamicin Reagent                                                       | ThermoFisher, 15710                  | 5 µg/mL            | -                                          |
| <b>Alizarin Red S Staining Solution</b>                                  |                                      |                    |                                            |
| Alizarin Red S <sup>d</sup>                                              | Millipore Sigma, A5533-25G           | 2%                 | -                                          |
| <b>Chondrogenesis Differentiation Medium</b>                             |                                      |                    |                                            |
| StemPro® Osteocyte/Chondrocyte Differentiation Basal Medium <sup>b</sup> | ThermoFisher, A10069-01              | 1X                 | -                                          |
| StemPro® Chondrogenesis Supplement <sup>c</sup>                          | ThermoFisher, A10064-01              | 1X                 | -                                          |
| Gentamicin Reagent                                                       | ThermoFisher, 15710                  | 5 µg/mL            | -                                          |
| <b>Complete Medium<sup>e</sup></b>                                       |                                      |                    |                                            |
| Dulbecco's Modified Eagle Medium Nutrient Mixture DMEM F12               | ThermoFisher, 11330-032              | -                  | -                                          |
| Fetal Bovine Serum, Qualified Standard <sup>f</sup>                      | ThermoFisher, 12483-020              | 20%                | -                                          |
| Ascorbic Acid, Reagent Grade, LabChem <sup>TMd</sup>                     | Fisher Scientific, LC115309          | 100 mM             | -                                          |
| Primocin <sup>TMg</sup>                                                  | InvivoGen, ant-pm-1                  | 100µg/mL           | -                                          |
| <b>LipidTox Stain</b>                                                    |                                      |                    |                                            |
| HCS LipidTOX <sup>TM</sup> Green Neutral Lipid Stain <sup>h</sup>        | InvivoGen, H34475                    | 1:100 dilution     | Prepare a volume to completely cover cells |
| <b>Osteogenesis Differentiation Medium</b>                               |                                      |                    |                                            |
| StemPro® Osteocyte/Chondrocyte Differentiation Basal Medium <sup>b</sup> | ThermoFisher, A10069-01              | 1X                 | -                                          |
| StemPro® Osteogenesis Supplement <sup>c</sup>                            | ThermoFisher, A10066-01              | 1X                 | -                                          |
| Gentamicin Reagent                                                       | ThermoFisher, 15710                  | 5 µg/mL            | -                                          |
| <b>Paraformaldehyde (PFA) 4%<sup>i</sup></b>                             |                                      |                    |                                            |
| 16% Formaldehyde                                                         | ThermoFisher, 28906                  | 4%                 | Dilute in PBS<br>ThermoFisher, 70011044    |
| <b>Staining Buffer Solution<sup>j</sup></b>                              |                                      |                    |                                            |
| Stain Buffer (FBS)                                                       | BD Pharmingen <sup>TM</sup> , 554656 | -                  | -                                          |
| <b>Trypsin Solution</b>                                                  |                                      |                    |                                            |
| TrypLE <sup>TM</sup> Select 10x <sup>k</sup>                             | ThermoFisher, A12177-02              | -                  | -                                          |

<sup>a</sup> Store at room temperature up to 4 months from date of receipt.<sup>b</sup> Store at 2°C to 8°C; protected from light for up to 12 months.<sup>c</sup> Store at -20°C to -5°C in the dark for up to 12 months.<sup>d</sup> Store at room temperature<sup>e</sup> Store at 4°C and warm in 37°C water bath for 15-20 min before use.<sup>f</sup> Store at -20°C and warm in 37°C water bath for 15-20 min before use.<sup>g</sup> Store at 4°C for 3 months or at -20 °C for long-term storage<sup>h</sup> Store at -20°C protected from light<sup>i</sup> Store at -20°C in 1ml aliquots and use within 6 months<sup>j</sup> Store undiluted at 4°C<sup>k</sup> Store at 15°C to 30°C protected from light for up to 24 months

**Table S2.** Cell Count and Time Took to P2 Split of MSCs since Harvest

| <b>Patient Number</b> | <b>Cell Count at P2</b> | <b>Days Took to P2</b> |
|-----------------------|-------------------------|------------------------|
| Patient 1             | 356,000                 | 33                     |
| Patient 2             | 410,000                 | 46                     |
| Patient 3             | 800,000                 | 13                     |
| Patient 4             | 940,000                 | 12                     |
| Patient 5             | 337,000                 | 25                     |
| Patient 6             | 1,300,000               | 16                     |
| Patient 7             | 900,000                 | 23                     |
| Patient 8             | 550,000                 | 30                     |
| Patient 9             | 1,300,000               | 10                     |
| Patient 10            | 1,200,000               | 10                     |
| Patient 11            | 2,500,000               | 10                     |
| Patient 12            | 1,000,000               | 20                     |
| Patient 13            | 570,000                 | 18                     |
| Patient 14            | 1,300,000               | 11                     |
| Patient 15            | 500,000                 | 20                     |
| Patient 16            | 1,200,000               | 11                     |
| Patient 17            | 10,000,000              | 27                     |
| Patient 18            | 10,000,000              | 25                     |
| Patient 19            | 812,000                 | 11                     |
| Patient 20            | 1,500,000               | 10                     |
| Patient 21            | 768,000                 | 7                      |
| Patient 22            | 1,500,000               | 26                     |
| Patient 23            | 1,260,000               | 34                     |
| Patient 24            | 2,480,000               | 19                     |
| Patient 25            | 1,000,000               | 32                     |
| Patient 26            | 1,800,000               | 27                     |
| Patient 27            | 905,000                 | 20                     |
| Patient 28            | 80,000                  | 15                     |
| Patient 29            | 940,000                 | 12                     |
| Patient 30            | 955,000                 | 26                     |
| Patient 31            | 860,000                 | 20                     |
| Patient 32            | 953,000                 | 31                     |
| Patient 33            | 900,000                 | 26                     |
| Patient 34            | 850,000                 | 21                     |
| Patient 35            | 1,180,000               | 30                     |
| Patient 36            | 2,000,000               | 59                     |
| Patient 37            | 2,675,000               | 59                     |
| Patient 38            | 540,000                 | 53                     |
| Patient 39            | 1,100,000               | 47                     |
| Patient 40            | 4,900,000               | 47                     |
| Mean                  | 1,628,025               | 25                     |
| Median                | 977,500                 | 22                     |
